# Supplementary material for: Performance evaluation of MOMA – a remote network calibration technique for PM 2.5 and PM 10 sensors
Source: Copernicus journal article supplement (doi:10.5194/egusphere-2023-969), 2023-05-30
Supplement: Supplementary file 1 [file egusphere-2023-969-supplement.pdf]

# Supplementary Information - Performance evaluation of MOMA - a remote network calibration technique for PM<sub>2.5</sub> and PM<sub>10</sub> sensors

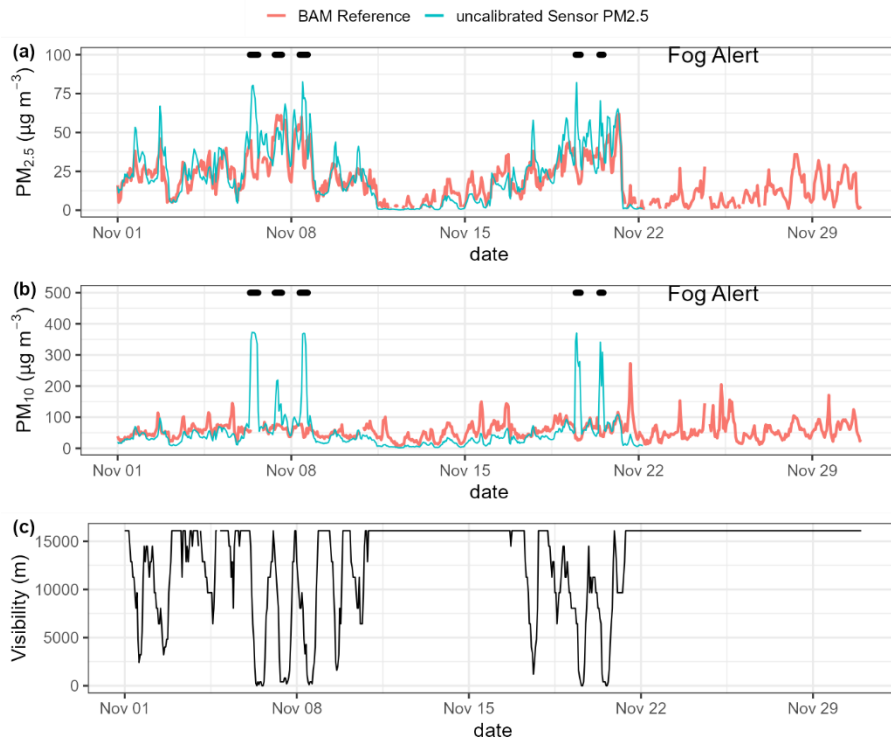

5 Figure S1. Timeseries for November 2021 – showing the uncalibrated and BAM reference PM<sub>2.5</sub> (a) and PM<sub>10</sub> (b) as well as the visibility measured by the NOAA weather station located at Riverside Airport (c) to illustrate the impact of fog.

10

15

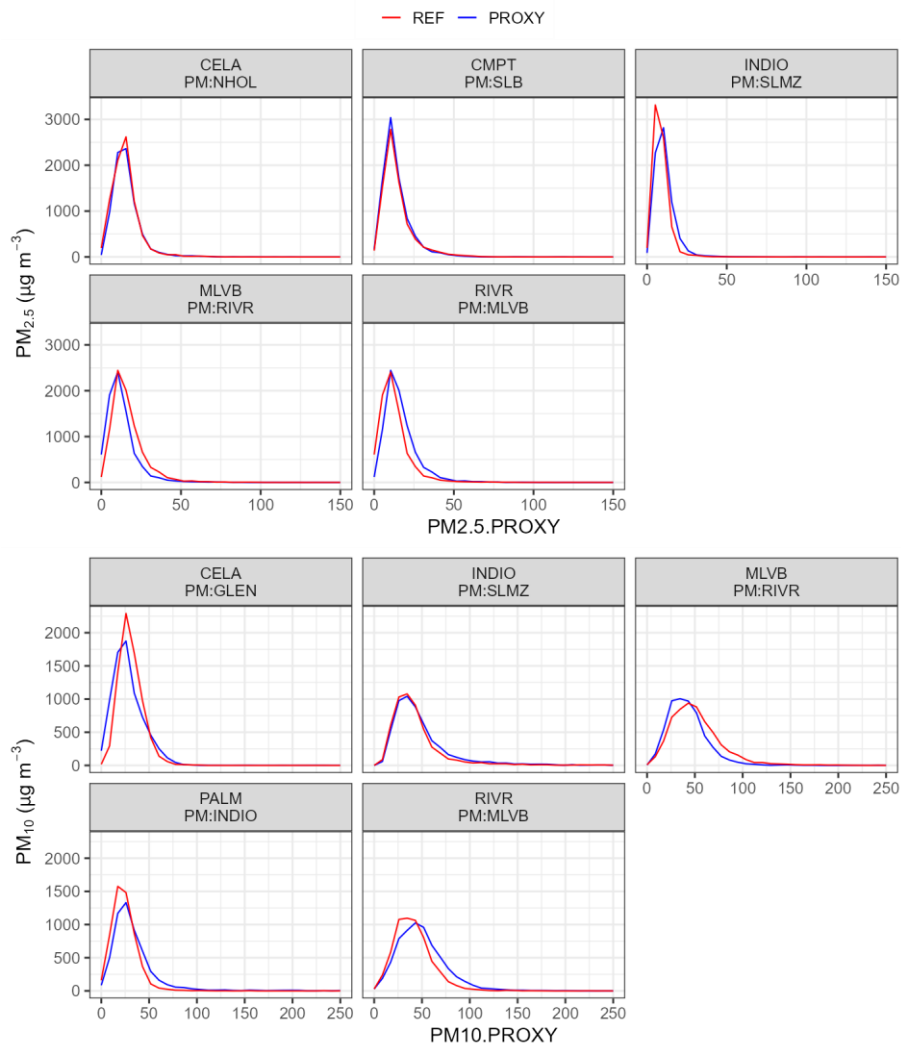

20

Figure S2. Probability distributions for the Reference  $PM_{2.5}$  (a) and  $PM_{10}$  (b) versus the nearest Proxy  $PM_{2.5}$  and  $PM_{10}$ , respectively.

25

Table S1. AMS information based on South Coast AQMD Monitoring Network Plan

30 <http://www.aqmd.gov/home/air-quality/clean-air-plans/monitoring-network-plan>.

| AMS                | PM <sub>2.5</sub> |              | PM <sub>10</sub> |              |
|--------------------|-------------------|--------------|------------------|--------------|
|                    | Continuous        | FRM Schedule | Continuous       | FRM Schedule |
| RIVR               | BAM1020           | Daily        | BAM1020          | 1:3 days     |
| MLVB               | BAM1020           | Daily        | BAM1020          | 1:6 days     |
| SNBO               | -                 | 1:3 days     | BAM1020          | -            |
| CRES               | BAM1020           | -            | -                | 1:6 days     |
| PALM               | -                 | 1:3 days     | Thermo 5014i     | -            |
| INDIO              | BAM1020           | 1:12 days    | Thermo 5014i     | 1:6 days     |
| GLEN               | BAM1020           | -            | BAM1020          | -            |
| ANA                | BAM1020           | Daily        | BAM1020          | -            |
| CELA               | BAM1020           | Daily        | BAM1020          | 1:6 days     |
| CMPT               | BAM1020           | Daily        | -                | -            |
| NHOL               | BAM1020           | -            | -                | -            |
| SLMZ <sup>1)</sup> | T640              | -            | T640             | -            |

<sup>1)</sup> The T640 at Saul Martinez (SLMZ) is run by a special monitoring project and is not part of the Ambient Monitoring Network.

Table S2. Deployment dates for the collocated AQYs used in this study.

| <b>Date Deployed</b> | <b>Serial Number</b> |
|----------------------|----------------------|
| 4/03/2020            | BD-1129              |
| 4/03/2020            | BD-1146              |
| 6/19/2020            | BD-1069              |
| 6/19/2020            | BD-1075              |
| 11/03/2020           | BD-1071              |
| 11/03/2020           | BD-1072              |
| 11/03/2020           | BD-1081              |
| 12/17/2020           | BD-1112A             |
| 10/16/20             | BD-1088              |
| 10/16/20             | BD-1090              |
| 08/14/20             | BD-1093A             |
| 1/08/2021            | BD-1110              |

40 Table S3. Parameter code used to do retrieve the speciation data from the RAQSAPI package and the parameter it refers to as well as the group it has been assigned to.

| <b>Code</b> | <b>Value represented</b> | <b>Category</b>  |
|-------------|--------------------------|------------------|
| 88104       | Aluminum PM2.5 LC        | Crustal Material |
| 88111       | Calcium PM2.5 LC         | Crustal Material |
| 88126       | Iron PM2.5 LC            | Crustal Material |
| 88140       | Magnesium                | Crustal Material |
| 88165       | Silicon PM2.5 LC         | Crustal Material |
| 88180       | Potassium                | Crustal Material |
| 88184       | Sodium PM2.5 LC          | Trace Ions       |
| 88203       | Chloride                 | Trace Ions       |
| 88301       | Ammonium                 | Secondary Ions   |
| 88303       | Potassium Ion            | Trace Ions       |
| 88306       | Total Nitrate            | Secondary Ions   |
| 88381       | EC PM2.5 LC TOT          | Elemental Carbon |
| 88382       | OC PM2.5 LC TOT          | Organic Carbon   |
| 88403       | Sulfate PM2.5 LC         | Secondary Ions   |
